# Supplementary material for: Investigation of Post-Treatment Improving Perovskite Solar Cells Initial Performances and Study of Its Impact on the Durability
Source: MDPI journal article supplement (doi:10.3390/en16145254), 2023-07-08
Supplement: s1 [file s1]

Archive with 1 entries (1 files):
- energies-2478099-supplementary.pdf
