# Supplementary material for: Investigation of Post-Treatment Improving Perovskite Solar Cells Initial Performances and Study of Its Impact on the Durability
Source: MDPI journal article supplement (doi:10.3390/en16145254), 2023-07-08
Supplement: s1 [file s1 › energies-2478099-supplementary.pdf]

## Supplementary information

### Investigation of Post-Treatment Improving Perovskite Solar Cells Initial Performances and Study of Its Impact on the Durability

Lara Perrin<sup>\*1</sup>, Lionel Flandin<sup>1</sup>, Cynthia Farha<sup>1</sup>, Stéphanie Narbey<sup>2</sup>, David Martineau<sup>2</sup>, Emilie Planès<sup>1</sup>

<sup>1</sup> University Grenoble Alpes, University Savoie Mont Blanc, CNRS, Grenoble INP, LEPMI, 38000 Grenoble, France

<sup>2</sup> Solaronix S.A., Rue de l'Ouriette 129, 1170 Aubonne, Switzerland

\* Correspondence: lara.perrin@univ-smb.fr

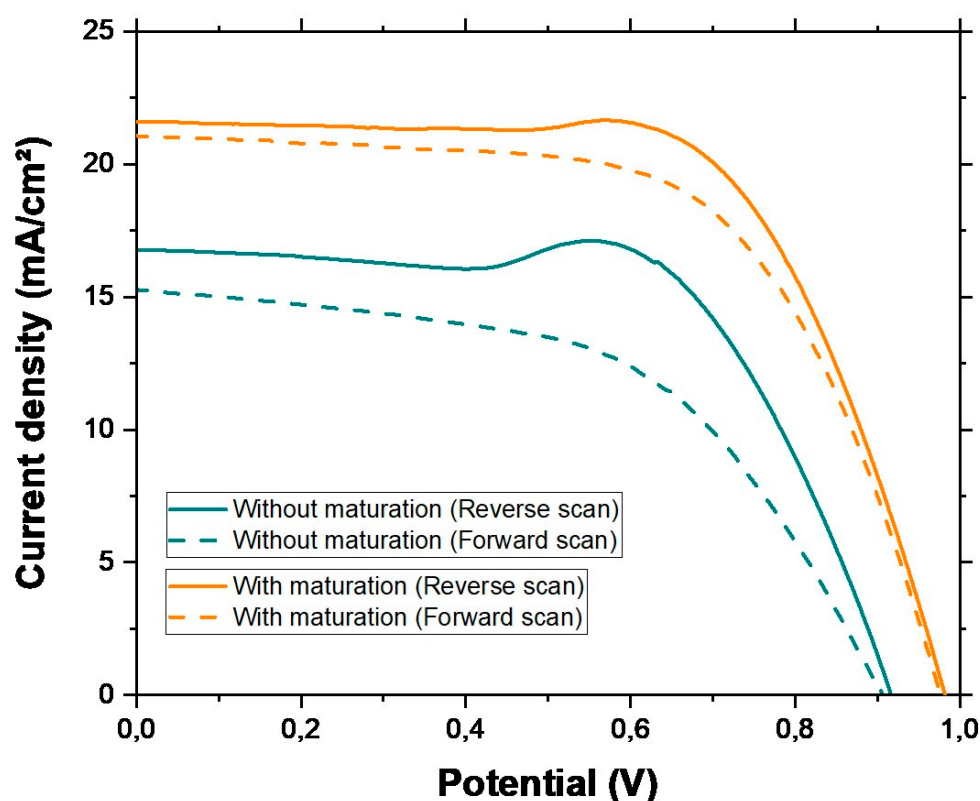

Figure S1. Typical J-V curves (in reverse and forward modes, 4mV/s) obtained before and after the maturation step

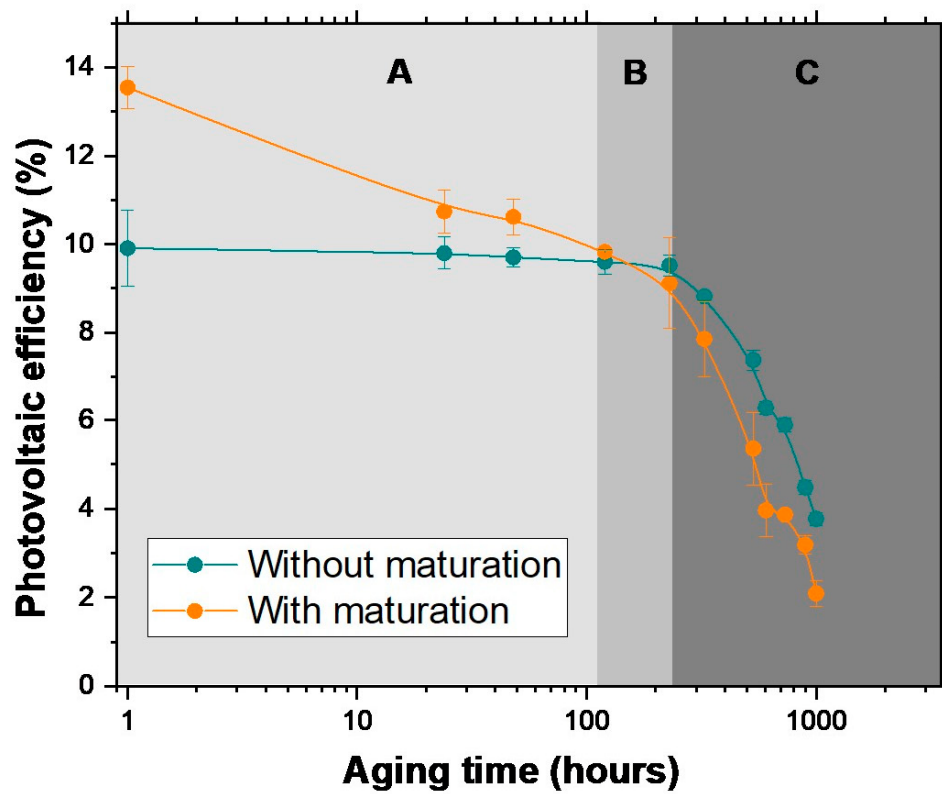

**Figure S2.** Non-normalized losses in power conversion efficiency (PCE,%) during aging (85°C, 85% RH)

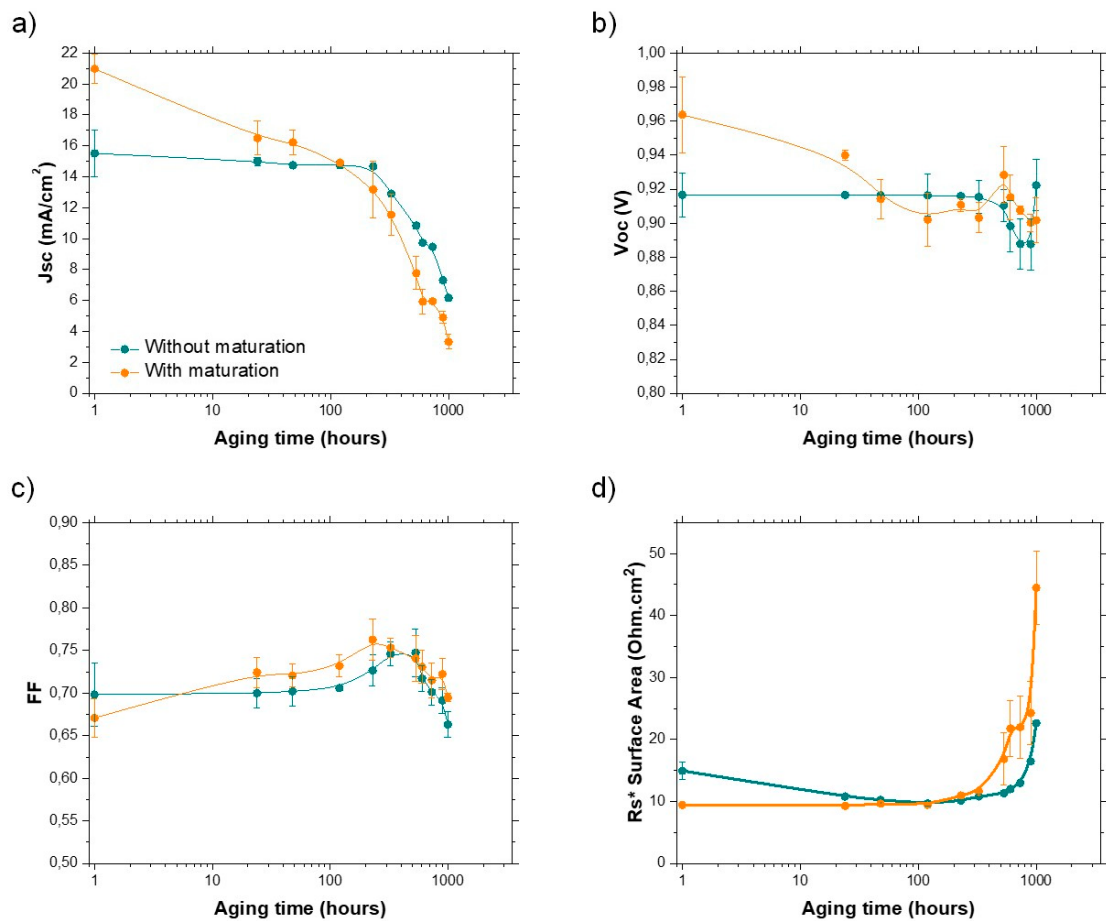

**Figure S3.** Photovoltaic parameters during aging (85°C, 85% RH): **a)**  $J_{sc}$ , **b)**  $V_{oc}$ , **c)** FF and **d)**  $R_s$

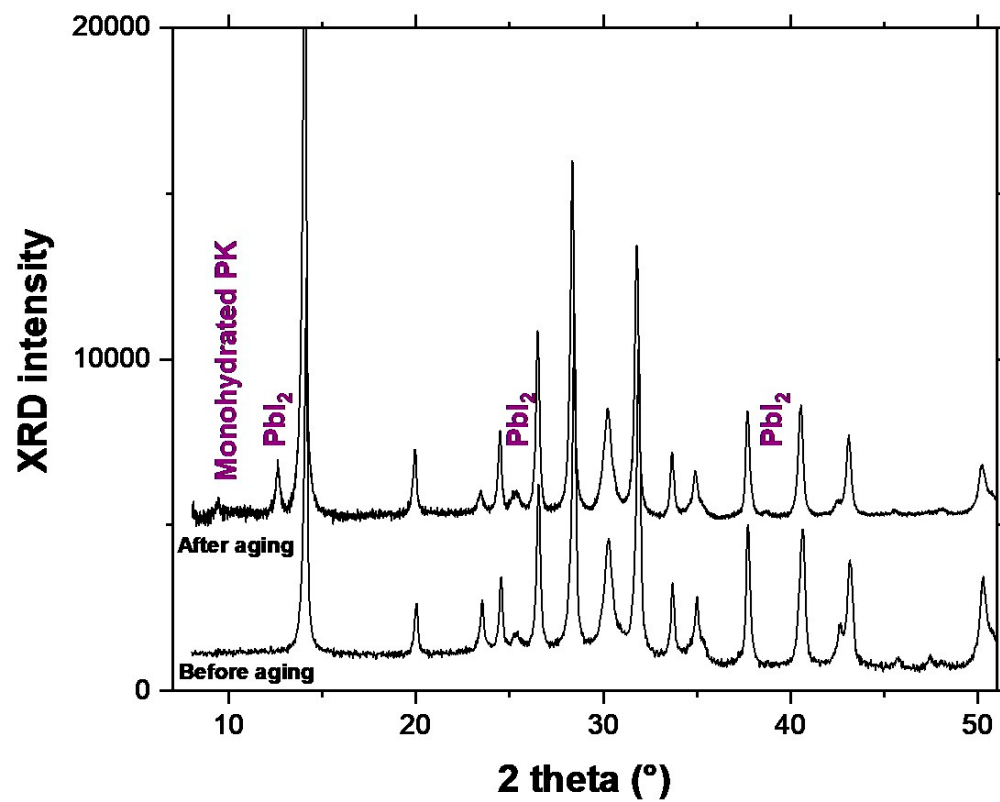

**Figure S4.** Full XRD diffractograms of perovskite layers before and after aging (example for matured devices), highlight on observed degradation products
